# Supplementary material for: Protective effect of FOXP3-mediated miR-146b-5p/Robo1/NF-κB system on lipopolysaccharide-induced acute lung injury in mice
Source: PubMed Central journal article supplement — Ann Transl Med. 2020 Dec;8(24):1651. doi: 10.21037/atm-20-7703 (PMC7812239; doi:10.21037/atm-20-7703), 2020-12
Supplement: atm-08-24-1651-dss.pdf [file atm-08-24-1651-dss.pdf]

## Data Sharing Statement

**Article Info** <http://dx.doi.org/10.21037/atm-20-7703>

| Item | Question                                                                                                                                            | Authors' Response<br>(place “-” if not applicable) |
|------|-----------------------------------------------------------------------------------------------------------------------------------------------------|----------------------------------------------------|
| 1    | Would you like to share data collected for your study to others?                                                                                    | Yes.                                               |
| 2    | If not, would you like to share the reason for your decision?                                                                                       |                                                    |
| 3    | What data in particular will be shared?                                                                                                             | -                                                  |
| 4    | Any other documents will be shared? Such as study protocol, statistical analysis plan, informed consent form, clinical study report, analytic code. | -                                                  |
| 5    | When will data availability begin?                                                                                                                  | Three years later.                                 |
| 6    | When will data availability end?                                                                                                                    | -                                                  |
| 7    | To whom will you share the data?                                                                                                                    | Researchers in the same field.                     |
| 8    | For what type of analysis or purpose?                                                                                                               | -                                                  |
| 9    | How or where can the data/documents be obtained?                                                                                                    | E-mial.                                            |
| 10   | Any other restrictions?                                                                                                                             | -                                                  |
